# Supplementary material for: Microencapsulation of Enteric Bacteriophages in a pH-Responsive Solid Oral Dosage Formulation Using a Scalable Membrane Emulsification Process
Source: MDPI journal article supplement (doi:10.3390/pharmaceutics11090475), 2019-09-14
Supplement: s1 [file s1]

# Supplementary Materials: Microencapsulation of Enteric Bacteriophages in a pH-Responsive Solid Oral Dosage Formulation Using a Scalable Membrane Emulsification Process

Gurinder K. Vinner, Kerry Richards, Miika Leppanen, Antonia P. Sagona and Danish J. Malik

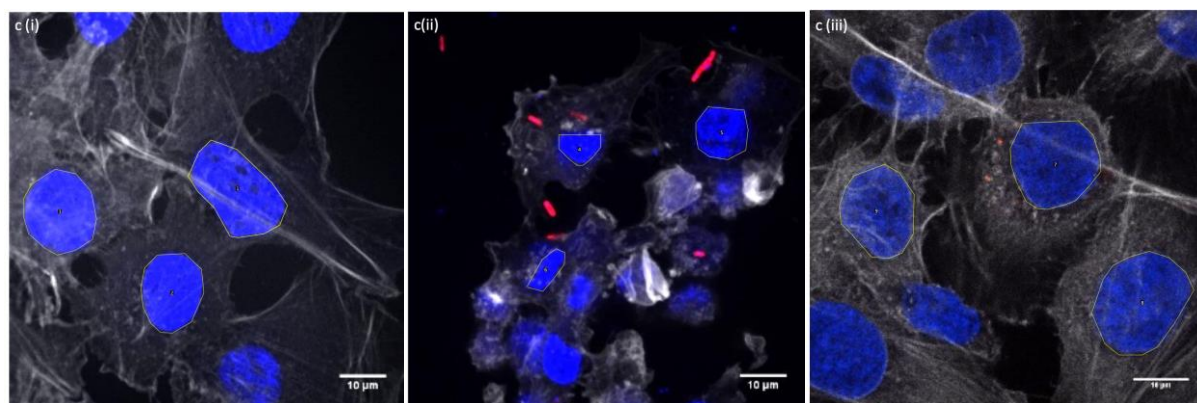

**Figure S1.** Measurement of cell nucleus perimeter using Fiji image processing software and calculation of nucleus area for each of the cells shown in Figure 8c.

**Table S1.** Summary of microencapsulated EKF1 storage results.

| Storage Period/Weeks | Mean/PFU g <sup>-1</sup>           | Lower 95% CI          | Upper 95% CI          |
|----------------------|------------------------------------|-----------------------|-----------------------|
| 0                    | <sup>a</sup> 1.8 x10 <sup>8</sup>  | 8.9 x10 <sup>7</sup>  | 2.8 x10 <sup>8</sup>  |
| 1                    | <sup>a</sup> 1.1 × 10 <sup>8</sup> | 8.4 × 10 <sup>7</sup> | 1.3 × 10 <sup>8</sup> |
| 2                    | <sup>a</sup> 1.1 × 10 <sup>8</sup> | 8.4 × 10 <sup>7</sup> | 1.3 × 10 <sup>8</sup> |
| 3                    | <sup>a</sup> 8.3 × 10 <sup>7</sup> | 5.0 × 10 <sup>7</sup> | 1.2 × 10 <sup>8</sup> |
| 4                    | <sup>a</sup> 8.8 × 10 <sup>7</sup> | 6.0 × 10 <sup>7</sup> | 1.1 × 10 <sup>8</sup> |

Notes: CI = confidence interval; different superscripts in the same column indicate significantly different mean values at  $p < 0.05$  (2-sample t-test) comparison with storage period 0 weeks.

**Table S2.** Summary of calculated areas of each cell nucleus. Cell no. refers to cells shown in Figure S1.

| Cell no. | Nucleus Area |
|----------|--------------|
| 1        | 745          |
| 2        | 580          |
| 3        | 632          |
| 4        | 315          |
| 5        | 446          |
| 6        | 304          |
| 7        | 728          |
| 8        | 790          |
| 9        | 671          |
